# Supplementary material for: Metabolomics analysis reveals different mechanisms of Cadmium response and functions of reduced glutathione in Cadmium detoxification in the Chinese cabbage
Source: Research Square preprint supplement (doi:10.21203/rs.3.rs-1334779/v1), 2022-03-15
Supplement: Supplementary file 1 [file 1e1bf2dea659ff40e1cacb17.xlsx]

## Sheet: Sheet1
Supplemental Table S6. DEMs specifically identified in both C1 (5 μM Cd vs Control) and C3 (100 μM Cd vs Control).
Metabolites	Log2FC (C1)	Log2FC (C3)	Ion detection mode
1-(4-Hydroxybenzyl)-2-methoxy-9,10-dihydro-4,5-phenanthrenediol	2.87488	3.96032	ESI+
Fructoselysine	1.99111	2.89009	ESI+
Lovastatin	1.86532	2.66813	ESI+
Dihydropteroic acid	1.54357	2.4468	ESI-
pralnacasan	1.53575	2.60405	ESI+
Podecdysone B	1.20882	1.7789	ESI+
Prostaglandin G2	1.12423	1.60475	ESI-
Etizolam	1.07921	1.79675	ESI-
Spenolimycin	1.05398	1.28176	ESI+
Mitraphylline	1.02689	1.48262	ESI-
synoxazolidinone C	0.987968	1.00831	ESI+
Pemetrexed	0.812377	1.54609	ESI+
Zanamivir	0.809383	0.939713	ESI+
3-O-feruloyl-D-quinic acid	0.665681	1.82802	ESI-
(4E)-4-[Hydroxy(phenyl)methylene]-5-phenyldihydro-2,3-furandione	0.650171	1.39528	ESI+
Temoporfin	-0.568438	-0.659206	ESI+
PROXIMICIN A	-0.602749	-1.22984	ESI+
leucascandrolide A	-0.654709	-0.792764	ESI+
Ethyl 3-(3-chlorophenyl)-1-[(4-methylbenzoyl)amino]-5-oxoprolinate	-0.673505	-0.763233	ESI+
PIVOPRIL	-0.771552	-0.811507	ESI+
aspoquinolone A	-0.851891	-0.67891	ESI+
Rhizocticin D	-0.900447	-0.902995	ESI+
Astaxanthin	-0.991181	-1.06857	ESI-
Indican	-1.02977	-1.1649	ESI-
arclofenin	-1.05971	-1.22262	ESI+
Fusarin C	-1.08767	-1.33996	ESI+
guaiapate	-1.15354	-1.38547	ESI+
3-[2-(Benzylsulfanyl)-1,2-diphenylethyl]-6-fluoro-1H-indole	-1.31593	-1.41655	ESI+
3-Hydroxy-4-(trimethylsilyl)-2-pyridinyl dimethylsulfamate	-3.86515	-3.91262	ESI+
