# Supplementary material for: Metabolomics analysis reveals different mechanisms of Cadmium response and functions of reduced glutathione in Cadmium detoxification in the Chinese cabbage
Source: Research Square preprint supplement (doi:10.21203/rs.3.rs-1334779/v1), 2022-03-15
Supplement: Supplementary file 2 [file 387b33aeb55ca3bc5121cf63.xlsx]

## Sheet: Sheet1
Supplemental Table S3. DEMs specifically identified in C2 (25 μM Cd vs Control).
Metabolites	Log2FC(C2)	Ion detection mode
Leu-Leu-Tyr	2.33922	ESI+
MFCD00045988	2.08108	ESI-
tolpyrramide	1.98317	ESI+
L-Glutathione (reduced)	1.97802	ESI+
Xaliproden	1.92167	ESI+
Ninhydrin	1.85732	ESI+
sinapoyltartronic acid	1.58129	ESI-
semduramicin	1.54965	ESI+
2,4-Diacetylphloroglucinol	1.54057	ESI-
14-deacetylnudicauline	1.50587	ESI-
2-O-(6-phosphono-alpha-D-mannosyl)-D-glyceric acid	1.44866	ESI+
17beta-Hydroxy-7alpha-mercaptoandrost-4-en-3-one 7-propionate	1.43697	ESI-
onopordopicrin	1.37771	ESI+
N~2~-Octanoyllysylvaline	1.32387	ESI+
Ethyl 1-[(4-fluorobenzoyl)amino]-5-oxo-3-phenylprolinate	1.31062	ESI-
BRACO-19	1.30268	ESI+
Mexoryl SX	1.28083	ESI-
Vinpocetine	1.27527	ESI+
Cyclo(isoleucylphenylalanylphenylalanyl-N-methylphenylalanylleucyl)	1.23544	ESI-
2,2'-Bis(bromoethynyl)-1,1'-binaphthalene	1.21869	ESI+
gaboxadol	1.15826	ESI+
acetohexamide	1.13179	ESI-
Picrocrocin	1.12537	ESI-
nocardamin	1.10337	ESI+
Quisinostat	1.09572	ESI-
prucalopride	1.01908	ESI+
TRIMETHAPHAN	0.99911	ESI+
5-amino-6-(5-phospho-D-ribitylamino)uracil	0.987892	ESI-
(+/-)-Methoprene	0.968188	ESI+
N-(2-(2-((6-Chlorohexyl)oxy)ethoxy)ethyl)-6-fluoro-2-naphthamide	0.933071	ESI+
urobilinogen	0.925519	ESI-
malonyldaidzin	0.924793	ESI-
5-Benzyl-2,2-dimethyl-5-(4-vinylbenzyl)-1,3-dioxane-4,6-dione	0.908576	ESI+
bistabercarpamine A	0.841378	ESI-
Cucurbitacin A	0.832235	ESI-
nostocyclopeptide A1	0.804991	ESI+
ilomastat	0.802495	ESI-
NPC	0.792242	ESI-
Lamiide	0.778985	ESI+
Crolibulin	0.764818	ESI+
CYM5442	0.75946	ESI+
Arctiin	0.757149	ESI-
17beta-estradiol 17-glucosiduronic acid	0.733677	ESI+
MFCD15146035	0.732119	ESI-
Fludrocortisone acetate	0.724387	ESI+
Vibegron	0.700539	ESI+
Tonapofylline	0.677982	ESI-
L-Theanine	0.677007	ESI+
Azodolen	0.667257	ESI+
(2-((2,3,5,6-Tetrafluorophenyl)thio) ethyl)diphenylphosphine	0.662654	ESI-
Dacinostat	0.657348	ESI-
(1E)-3-Bromo-1-propen-1-yl benzoate	0.657236	ESI-
Karwinaphthol B	0.648863	ESI+
fluphenazine depot	0.643484	ESI-
Lysylglycyl-L-tyrosyl-N-(5-carboxypentyl)-L-tyrosinamide	0.643442	ESI-
1,4-Bis(2-ethylhexyl) sulfosuccinate	0.642667	ESI+
Kyotorphin	0.641693	ESI+
dihydroconiferyl alcohol glucoside	0.615933	ESI-
Nalpha-Benzyl-N-[(1S)-1-(hydroxyamino)-3-methylbutyl]-L-tyrosinamide	0.573529	ESI+
Cefepime	0.568141	ESI-
casimiroedine	-0.560095	ESI+
LY-294,002	-0.568342	ESI+
17-Propyl-5alpha-androst-2-en-17beta-ol	-0.572927	ESI+
(+)-Fusarisetin A	-0.590221	ESI+
2-[Bis(2-methylphenyl)phosphino]-1-phenyl-1H-pyrrole	-0.605416	ESI+
Clareolide	-0.607712	ESI+
LIPIDYL PSEUDOPTERANE A	-0.62088	ESI+
Thymine	-0.624891	ESI+
oxazolidinone	-0.633355	ESI+
chlorbenzoxamine	-0.660923	ESI+
N-[1-(Dihydroxyboryl)-3-methylbutyl]-alpha-asparagine	-0.705051	ESI+
Tipelukast	-0.711012	ESI+
abietatriene	-0.71439	ESI+
(.+-.)-Limonene	-0.747458	ESI+
Lofepramine	-0.781043	ESI+
Chaetomellic acid A anhydride	-0.818377	ESI+
Bucladesine	-0.900621	ESI+
N~6~-[(2-Cyclooctyn-1-yloxy)carbonyl]lysine	-0.901097	ESI+
PI-103	-0.9349	ESI+
NAN-190	-0.936387	ESI+
Ethyl 2-(4-biphenylyl)-2-[(trifluoromethyl)sulfanyl]-4-pentenoate	-0.939122	ESI+
(-)-Podophyllotoxin	-0.985931	ESI+
3-(1H-indol-6-yl)-1-methyl-pyrazolo[3,4-d]pyrimidin-4-amine	-0.999989	ESI-
2-Iodo-6-methoxyphenol	-1.0008	ESI+
avridine	-1.01689	ESI+
Tetramethylscutellarein	-1.11333	ESI-
Oleoyl-L-α-lysophosphatidic acid	-1.11966	ESI-
Indole-3-carbidol	-1.12002	ESI+
Nobiletin	-1.12567	ESI-
Perfluorooctanesulfonic acid	-1.2779	ESI+
Isoquinoline	-1.34285	ESI+
10-Deacetylbaccatin III	-1.39071	ESI-
2-Quinolinecarboxylic acid	-1.40181	ESI+
Phenylglyoxylic acid	-1.43139	ESI+
Lappaconitine	-1.4386	ESI+
Pheophorbide A	-1.44194	ESI+
5-Methoxy-3-indoleaceate	-1.50938	ESI+
2-(benzothiazol-6-ylamino)-4-(indan-5-ylamino)pyrimidine	-1.51261	ESI+
cephaloridine	-1.62936	ESI-
5-Bromo-2,6-bis(hexyloxy)-1-naphthaldehyde	-1.71006	ESI+
Difenpiramide	-1.77229	ESI+
5-Methyl-12-propylindolo[1,2-c]quinazolin-6(5H)-one	-2.03283	ESI-
ELLIPTICINE	-2.4183	ESI-
