# Supplementary material for: Metabolomics analysis reveals different mechanisms of Cadmium response and functions of reduced glutathione in Cadmium detoxification in the Chinese cabbage
Source: Research Square preprint supplement (doi:10.21203/rs.3.rs-1334779/v1), 2022-03-15
Supplement: Supplementary file 3 [file b18d04d59a6320c673e4ca94.xlsx]

## Sheet: Sheet1
Supplemental Table S5. DEMs specifically identified in both C1 (5 μM Cd vs Control) and C2 ( (25 μM Cd vs Control)).
Metabolites	Log2FC (C1)	Log2FC (C2)	Ion detection mode
2,6-Bis[1,1-di(2-pyridinyl)ethyl]pyridine	1.39045	0.845216	ESI+
18deoxycytochalasin Q	1.15557	1.19287	ESI+
N-benzoyl-12-demethoxycylindrocarine	0.771115	1.33807	ESI+
Isoleucyl-N-methyl-D-phenylalanyl-N-(2-carboxyphenyl)-L-leucinamide	0.639397	0.994132	ESI-
Ethamoxytriphetol	0.60723	0.835012	ESI+
Cystothiazole A	-0.665357	-0.583523	ESI+
N~4~,N~4~-Dibenzyl-2-methyl-N~1~-trityl-1,4-butanediamine	-1.16738	-0.982457	ESI-
